# Supplementary material for: Arabidopsis thaliana SPF1 and SPF2 are nuclear-located ULP2-like SUMO proteases that act downstream of SIZ1 in plant development
Source: PubMed Central journal article supplement (PMC6117582; doi:10.1093/jxb/ery265), 2018-07-25
Supplement: ery265_suppl_supplementary_material.pdf [file ery265_suppl_supplementary_material.pdf]

## Title

***Arabidopsis thaliana* SPF1 and SPF2 are nuclear-located ULP2-like SUMO proteases that act downstream of SIZ1 in plant development**

## Authors

Pedro Humberto Castro

Miguel Ângelo Santos

Sara Freitas

Pepe Cana-Quijada

Tiago Lourenço

Mafalda A. A. Rodrigues

Fátima Fonseca

Javier Ruiz-Albert

Jorge E. Azevedo

Rui Manuel Tavares

Araceli G. Castillo

Eduardo R. Bejarano

Herlânder Azevedo

## Supplementary data

**Fig. S1.** Protein sequence alignment of the catalytic domain of SPF1/2 subgroup members.

**Fig. S2.** Purification elution of recombinant proteins with the SPF2 and SPP1 catalytic domains with an N-terminus GST-tag.

**Fig. S3.** Schematic representation of Arabidopsis T-DNA insertion mutants for *SPF2* and *SPF1* and semi-quantitative RT-PCR.

**Fig. S4.** Plant and silique size of the wild-type Col-0 and *spf1/2* mutant.

**Fig. S5.** Morphology of 1-month-old plants of the *SPF2* and *SPF1* second allele T-DNA mutant.

**Fig. S6.** *In silico* analysis of *SPF2* and *SPF1* expression patterns.

**Table S1.** List of primers used for genotyping Arabidopsis T-DNA insertion lines.

**Table S2.** List of primers used in semi-quantitative and quantitative RT-PCR.

**Table S3.** List of primers used for plasmid constructs.

**Table S4.** *Cis*-elements over-represented in the promoter region of differentially expressed genes in *spf1/2*.

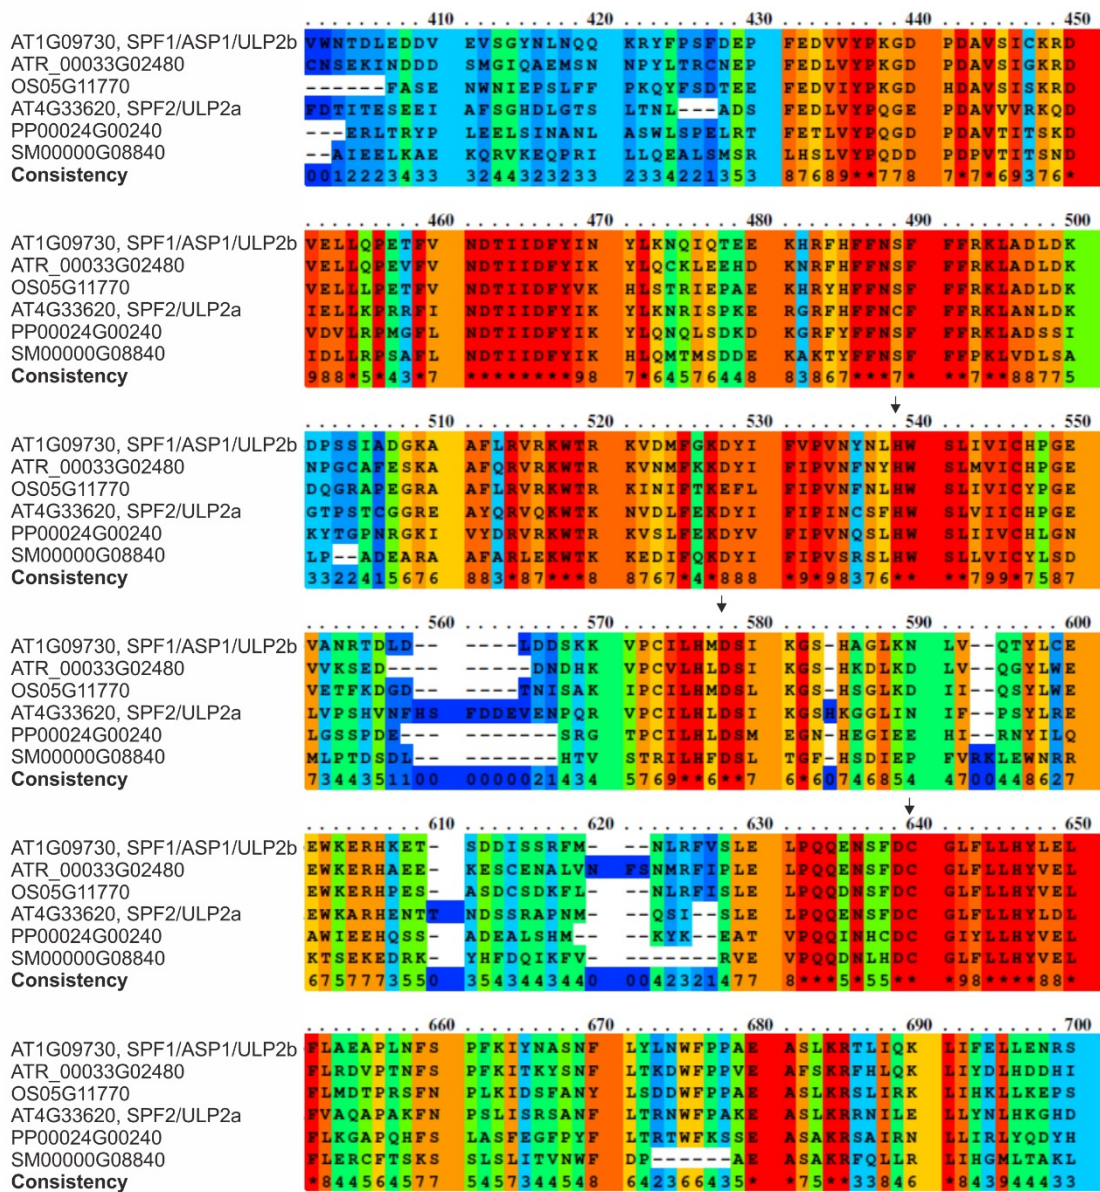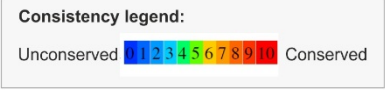

**Fig. S1.** Protein sequence alignment of the catalytic domain of SPF1/2 subgroup members. Protein sequences were retrieved from *Arabidopsis thaliana*, *Physcomitrella patens*, *Selaginella moellendorffii*, *Amborella trichopoda*, and *Oryza sativa* ssp. Japonica genomes, presenting the three conserved catalytic residues (arrows). Consistency between sequences (colour gradient) indicates the level of conservation of each residue. Protein sequence alignment was performed using PRALINE (<http://www.ibi.vu.nl/programs/pralinewww/>).

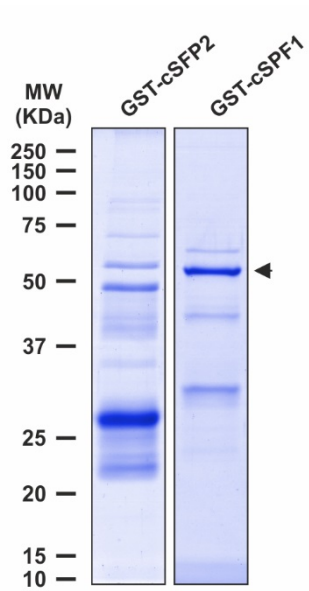

**Fig. S2.** Purification elution of recombinant proteins with the SPF2 and SPF1 catalytic domains with an N-terminus GST-tag. A protein elution aliquot ran in 10% SDS-PAGE and was stained with *Xpert Safe Protein Stain* (Grisp). Arrow indicates approximately the expected molecular weight for GST-SPFs recombinant proteins.

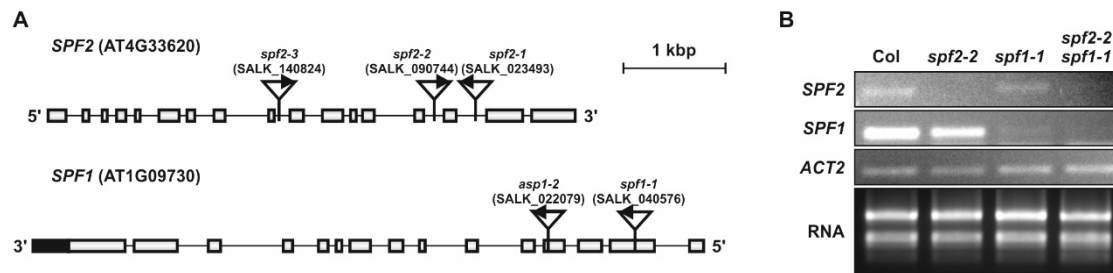

**Fig. S3.** Schematic representation of Arabidopsis T-DNA insertion mutants for *SPF2* and *SPF1* and semi-quantitative RT-PCR. **(A)** Schematic representation of *SPF2* and *SPF1* displaying exons (grey boxes), introns (thin lines), and UTRs (black boxes). The site and orientation of T-DNA insertions are represented by triangles with the respective SALK line code. Scale bar indicates 1 Kbp. **(B)** Semi-quantitative RT-PCR for wild-type (Col), *spf2-2* (*spf2*), *spf1-1* (*spf1*) and *spf2-2 spf1-1* (*spf1/2*). *ACT2* was used as a loading control and the total extracted RNA, used as template for reverse transcription, served as a quality control.

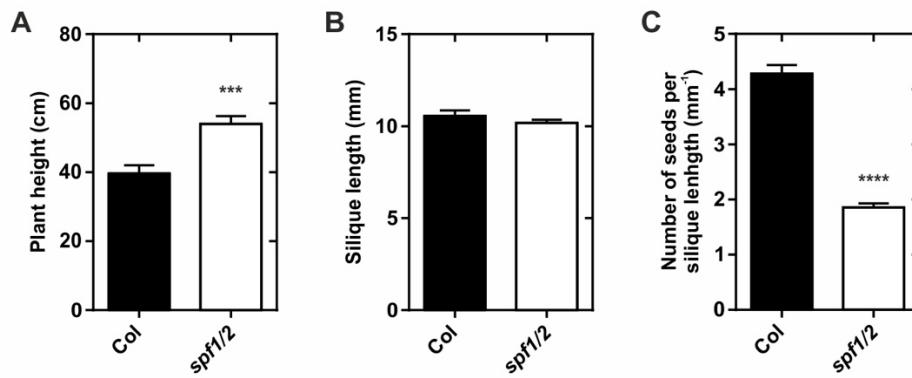

**Fig. S4.** Plant and silique size of the wild-type Col-0 and *spf1/2* mutant. Plant size at the end of life cycle (A), silique size (B) and number of seeds normalized by silique size (C). Error bars represent standard error of the means (SEM),  $n > 10$  (A), and  $n = 9$  (B, C). Asterisks indicate statistically significant differences with respect to the wild-type (unpaired t test; \*\*\*,  $P < 0.001$ ; \*\*\*\*,  $P < 0.0001$ ).

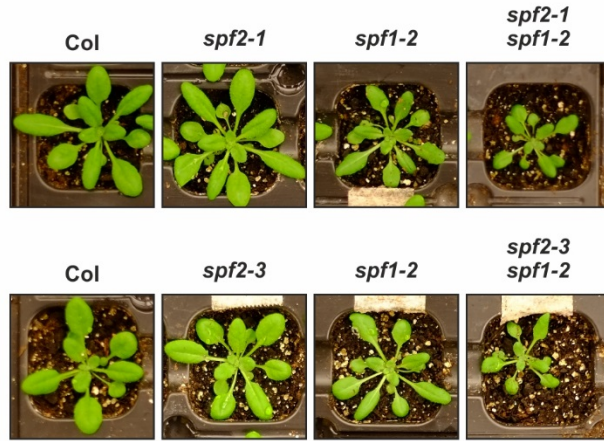

**Fig. S5.** Morphology of 1-month-old plants of the *SPF2* and *SPF1* second allele T-DNA mutants.

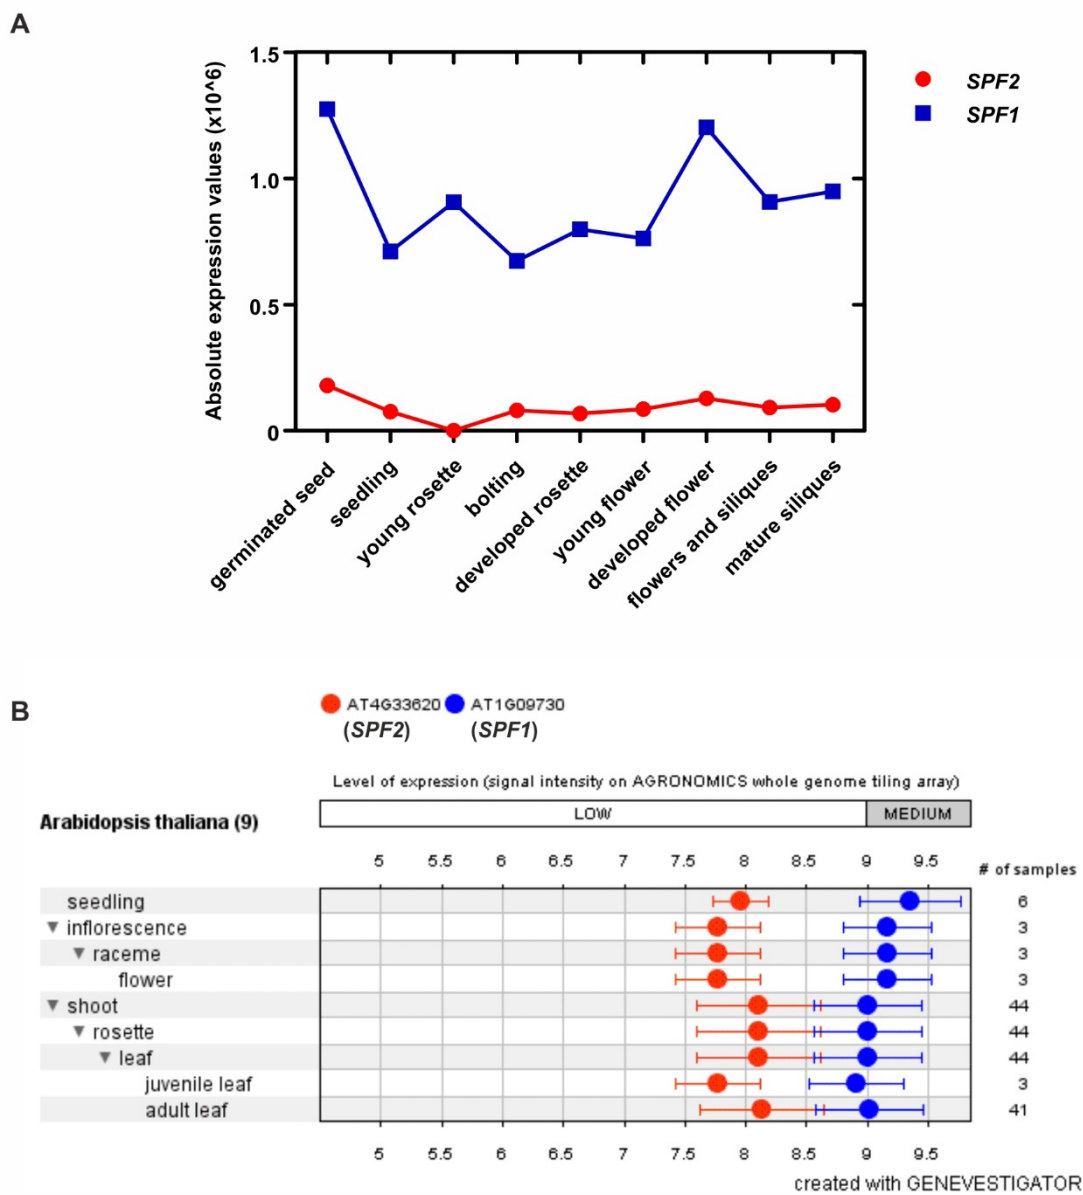

**Fig. S6.** *In silico* analysis of *SPF2* and *SPF1* expression patterns. Expression profile of Arabidopsis *SPF2* (red) and *SPF1* (blue) during development (**A**) and in different plant organs (**B**). Analysis was conducted in Genevestigator (genevestigator.com).

**Table S1.** List of primers used for genotyping Arabidopsis T-DNA insertion lines.

| <b>Primer name</b>     | <b>Primer sequence (5' to 3')</b>              | <b>Description</b>                                           |
|------------------------|------------------------------------------------|--------------------------------------------------------------|
| SPF2-2 LP<br>SPF2-2 RP | ACCCACAAAGGGTTCCTGCAT<br>TCTCTTGCTGCGGGAGCTGA  | Genotyping of <i>spf2-2</i> (SALK_090744)                    |
| SPF2-3 LP<br>SPF2-3 RP | CCAACTTTACAAGCTGCTTCG<br>TGCTGACAGGAATTGATCTCC | Genotyping of <i>spf2-3</i> (SALK_140824)                    |
| SPF2-1 LP<br>SPF2-1 RP | AATCAGTTTTGGTCGGTAGGC<br>AAAGCATGCATCCCTCTTTTC | Genotyping of <i>spf2-1</i> (SALK_023493)                    |
| SPF1-1 RP<br>SPF1-1 LP | TCCGCCTAGCTGGCAAGAGA<br>CCGGTTCTGCAACGCCAACG   | Genotyping of <i>spf1-1</i> (SALK_040576)                    |
| SPF1-2 RP<br>SPF1-2 LP | GTCAACGCCAGCTAAACTCAC<br>CCAAAATCGAATGAAAGCATG | Genotyping of <i>spf1-2</i> (SALK_022079)                    |
| SIZ1-2 RP<br>SIZ1-2 LP | CACGACAGATGAAGCATTGTG<br>GAGCTGAAGCATCTGGTTTTG | Genotyping of <i>siz1-2</i> (SALK_065397)                    |
| LBb1.3                 | ATTTTGCCGATTTTCGGAAC                           | Left border primer for genotyping SALK T-DNA insertion lines |



**Table S2.** List of primers used in semi-quantitative and quantitative RT-PCR.

| <b>Gene<br/>(AGI code)</b>  | <b>Primer name</b> | <b>Primer sequence (5' to 3')</b> | <b>T<sub>m</sub></b> | <b>GC<br/>(%)</b> | <b>Product<br/>size (bp)</b> |
|-----------------------------|--------------------|-----------------------------------|----------------------|-------------------|------------------------------|
| <i>ACT2</i><br>(At3g18780)  | ActinF             | CTAAGCTCTCAAGATCAAAGGCTTA         | 52.7                 | 40.0              | 211                          |
|                             | ActinR             | ACTAAAACGCAAACGAAAGCGGTT          | 57.2                 | 40.0              |                              |
| <i>SPF2</i><br>(At4g33620)  | SPF2 RT F          | CTTTTGACTGTGGCCTCTT               | 49.6                 | 47.4              | 183                          |
|                             | SPF2 RT R          | CTTTGTGGAGGTTGTAAAGC              | 49.1                 | 45.0              |                              |
| <i>SPF1</i><br>(At1g09730)  | SPF1 RT F          | GGAAGAAGAAATGGAAGGTC              | 47.8                 | 45.0              | 152                          |
|                             | SPF1 RT R          | CTAAATGGTCAGTGGTTTCC              | 48.2                 | 45.0              |                              |
| <i>CAD7</i><br>(At4g37980)  | CAD7 RT F1         | TTTCCTCTCATCTTTGGGCG              | 57.9                 | 50.0              | 144                          |
|                             | CAD7 RT R1         | GGCGGTGTTGACATAATCCG              | 59.3                 | 55.0              |                              |
| <i>KNAT1</i><br>(At4g08150) | KNAT1 RT F1        | AGTGGCCATATCCTTCTGAGTC            | 59.3                 | 50.0              | 181                          |
|                             | KNAT1 RT R1        | TCCATGTACAGAGCTGCGTG              | 60.1                 | 55.0              |                              |
| <i>NIA1</i><br>(At1g77760)  | NIA1 RT F1         | CCACCAGGAGAAACCGAACA              | 59.9                 | 55.0              | 167                          |
|                             | NIA1 RT R1         | TCATCCCCATGAGGTTCCAG              | 58.9                 | 55.0              |                              |
| <i>PER1</i><br>(At1g48130)  | PER1 RT F1         | TTCGCCAATTCTTGGACCGT              | 60.2                 | 50.0              | 199                          |
|                             | PER1 RT R1         | CCTTGCTTCCGTGATTAAAGGC            | 60.2                 | 50.0              |                              |
| <i>SOC1</i><br>(At2g45660)  | SOC1 RT F1         | GAGCAGCTCAAGCAAAAGGAGA            | 61.1                 | 50.0              | 137                          |
|                             | SOC1 RT R1         | GGGCTACTCTCTTCATCACCTC            | 59.6                 | 54.6              |                              |
| <i>XTH6</i><br>(At5g65730)  | XTH6 RT Fw1        | TGATCAGAGCACTGGATGTGG             | 59.8                 | 52.4              | 153                          |
|                             | XTH6 RT Rv1        | TCTAGCTCGTCTCACCCT                | 59.8                 | 55.0              |                              |
| <i>XTH31</i><br>(At3g44990) | XTH31 RT F1        | TCCACTGGGAGTGGGTTC                | 60.1                 | 57.9              | 191                          |
|                             | XTH31 RT R1        | GAATAAGGCTTCCCTGGCGT              | 60.1                 | 55.0              |                              |

*T<sub>m</sub>* - Melting temperature; *bp* - Base pair

**Table S3.** List of primers used for plasmid constructs.

| <b>Primer name</b> | <b>Primer sequence (5' to 3')</b>       | <b>Description</b>                                  |
|--------------------|-----------------------------------------|-----------------------------------------------------|
| SPF2 pENTR<br>Fw1  | TTGCGGCCGCCATGACTCTCCGGTCAGTTC<br>AATCC | Cloning into <i>pENTR</i> ; RS: <i>NotI</i>         |
| SPF2 pENTR<br>Rv1  | TTGGCGCGCCCAGTTTTTGGCTTGGCCATCA<br>CATT | Cloning into <i>pENTR</i> ; RS: <i>AscI</i>         |
| SPF1 pENTR<br>Fw1  | AAGCGGCCGCCATGAAGAAAACTTTGAA<br>GTATTCG | Cloning into <i>pENTR</i> ; RS: <i>NotI</i>         |
| SPF1 pENTR<br>Rv1  | AAGGCGCGCCCTTCTCCATCTCCTCAGCTT<br>CGCC  | Cloning into <i>pENTR</i> ; RS: <i>AscI</i>         |
| SPF2 pCM190<br>Fw1 | AGCTTTgtttaaacATGACTCTCCGGTCAGTTC       | Cloning into <i>pCM190</i> ; RS:<br><i>PmeI</i>     |
| SPF2 pCM190<br>Rv1 | ATAGTTTAGCGGCCGCTCAAGTTTTTGGCTT<br>GGCC | Cloning into <i>pCM190</i> ; RS; <i>NotI</i>        |
| cSPF2 pGEX5<br>Fw1 | TTGGATCCAAGATCTAGTTTACCCTCAAGG<br>AG    | Cloning into <i>pGEX-5X-1</i> ; RS:<br><i>BamHI</i> |
| cSPF2 pGEX5<br>Rv1 | AATAGCGGCCGCTTAACCTTGTGGAGGTT<br>GTAA   | Cloning into <i>pGEX-5X-1</i> ; RS:<br><i>NotI</i>  |
| cSPF1 pGEX5<br>Fw1 | AAGAATTCGAGGATGTTGTCTATCCAAAGG<br>GTG   | Cloning into <i>pGEX-5X-1</i> ; RS:<br><i>EcoRI</i> |
| cSPF1 pGEX5<br>Rv1 | AACTGCGGCCGCTTAGTTTTCAAGGAGTTC<br>AAAT  | Cloning into <i>pGEX-5X-1</i> ; RS:<br><i>NotI</i>  |

---

RS – Restriction site

**Table S4.** *Cis*-elements over-represented in the promoter region of differentially expressed genes in *spf1/2*. The DEGs were submitted to Athena analysis (O'Connor *et al.*, 2005; DOI: 10.1093/bioinformatics/bti714), to scan for binding site enrichment.

| <b><i>Cis</i>-element name</b>  | <b><i>Cis</i>-element sequence*</b> | <b>Nr. of genes</b> | <b>Predicted in the genome</b> | <b>Found in the genes</b> | <b><i>p</i>-value</b> | <b>Corresponding TFs</b> |
|---------------------------------|-------------------------------------|---------------------|--------------------------------|---------------------------|-----------------------|--------------------------|
| <b><i>Down-regulated</i></b>    |                                     |                     |                                |                           |                       |                          |
| <b><i>AtMYC2 BS in RD22</i></b> | CACATG                              | 61                  | 35%                            | 53%                       | < 10e-6               | MYC2                     |
| <b><i>MYCATERD1</i></b>         | CATGTG                              | 61                  | 35%                            | 53%                       | < 10e-6               | MYC2                     |
| <b><i>Up-regulated</i></b>      |                                     |                     |                                |                           |                       |                          |
| <b><i>AtMYC2 BS in RD22</i></b> | CACATG                              | 47                  | 35%                            | 47%                       | < 10e-3               | MYC2                     |
| <b><i>MYCATERD1</i></b>         | CATGTG                              | 47                  | 35%                            | 47%                       | < 10e-3               | MYC2                     |
| <b><i>CARGCW8GAT</i></b>        | CWWWWWWWWG                          | 70                  | 59%                            | 70%                       | < 10e-3               | AGL15                    |
| <b><i>TATA-box Motif</i></b>    | TATAAA                              | 91                  | 91%                            | 82%                       | < 10e-4               |                          |

\* R (A/G), M (A/C), W (A/T), K (G/T), B (C/G/T), N (A/C/G/T)
